1  
2  
3  
4  
5  
6  
7  
8  
9  
10  
11  
12  
13  
14  
15  
16  
17  
18  
19  
20  
21

**Social ecology of a woodland songbird community: from individual movements to the emergence of population social structure**

Damien R. Farine<sup>a,b,c</sup>, Ben C. Sheldon<sup>\*a</sup>

<sup>a</sup> Edward Grey Institute of Field Ornithology, Department of Zoology, University of Oxford, South Parks Road, Oxford OX1 3PS, United Kingdom.

<sup>b</sup> Department of Collective Behaviour, Max Planck Institute for Ornithology, Universitätsstrasse 10, 78457 Konstanz, Germany.

<sup>c</sup> Department of Biology, University of Konstanz, Universitätsstrasse 10, 78457 Konstanz, Germany.

\* Corresponding author:  
damien.farine@orn.mpg.de

22 ABSTRACT

23

24 Social structure can have profound evolutionary and ecological implications for  
25 animal populations. Structure can arise and be maintained via social preferences or  
26 be indirectly shaped by habitat structure. Quantifying the drivers of social structure  
27 is important to understand how social networks can shape evolutionary landscapes.  
28 Here, we study a large community of wild birds fitted with uniquely-coded passive  
29 integrated transponder (PIT) tags and recorded on a grid of automated feeders  
30 fitted with radio frequency identification (RFID) antennae. These data reveal that  
31 preferred movement pathways between sites that are consistent between years and  
32 not predicted by habitat features alone drive between-year consistent multi-level  
33 community structure in the social network. Our study highlights how ecological  
34 factors can shape social structure at the population scale, which has widespread  
35 implications for understanding eco-evolutionary dynamics.

36

37 INTRODUCTION

38 The social environment can fundamentally shape the life histories of animals. Who  
39 individuals associate with can determine the information they have access to <sup>1, 2, 3</sup>,  
40 affect how well they can exploit resources <sup>4, 5, 6</sup>, and impact their ability to  
41 successfully reproduce <sup>7, 8, 9, 10</sup>. Social structure can also influence population  
42 processes, such as the spread of information within <sup>11, 12, 13</sup> and between <sup>14</sup> species,  
43 and the spread of disease among individuals <sup>15, 16</sup>. Finally, individuals can experience  
44 selection arising from properties of their social groups <sup>7, 8</sup> or their communities <sup>17</sup>.  
45 Quantifying the factors that shape individuals' social environments is therefore a  
46 key step in determining the evolutionary drivers of sociality <sup>18, 19</sup> as the mechanisms  
47 that determine where, and with whom, individuals live their lives are what selection  
48 arising from population processes (e.g. disease burden or information use) can act  
49 upon.

50

51 Population social structure (the patterns of connections that emerges from  
52 interactions among individuals, often represented using social networks) is

53 generally considered to arise from individuals making decisions about whom to  
54 associate with <sup>20</sup>. However, because spatial proximity is a key requirement for  
55 associations or interactions (i.e. connections) among animals <sup>21</sup>, patterns of  
56 connections among individuals are bound to be shaped by a number of extrinsic  
57 factors, such as geometry and structure of the habitat that promote or restrict  
58 individual movements. At a local scale, habitat structure, such as understorey  
59 density, can channel individual movements, thus influencing the propensity for  
60 contact among individuals. At a broader scale, movement 'highways' can  
61 significantly reduce the social distance among individuals despite a large spatial  
62 separation, and therefore facilitate the flow of information or disease <sup>22</sup>. For  
63 example, sleepy lizards (*Tiliqua rugosa*) living in open habitats had fewer contacts  
64 with conspecifics than those living in more structured habitats <sup>23</sup>. Whilst habitat  
65 features can promote movements, the geometry of habitat (such as habitat  
66 fragmentation) can introduce barriers that constrain individual movements. Such  
67 barriers can result in a structure where the social distance between two individuals  
68 (i.e. their degrees of separation in a social network) on either side of this barrier  
69 could be much greater than their actual spatial distance. Habitat geometry and  
70 features can therefore impose structure in a social network that could easily be  
71 interpreted as arising socially. Given that local heterogeneity in gene flow can lead  
72 to rapid evolutionary differentiation <sup>24</sup>, integrating knowledge about fine-scale  
73 environmental heterogeneity into studies of social structure could fundamentally  
74 alter our understanding of adaptation and the ability for animals to respond to  
75 selective pressures.

76

77 A major challenge in identifying extrinsic factors that drive population social  
78 structure is the need to have information about the movement of individuals in  
79 space, the patterns of social connections among the majority of individuals in a  
80 population, and information about the habitat in which they live. Recent  
81 technological advances have eased the logistical constraints of sampling many  
82 individuals moving across large areas <sup>25, 26, 27</sup>. In particular, passive integrated  
83 transponder (PIT) tags are cheap electromagnetic tags that can be fitted to many

84 individuals at once <sup>28</sup>, thus overcoming the challenges associated with studying  
85 entire animal communities. Because PIT tags do not rely on battery power to emit a  
86 signal, but instead are detected by affecting the magnetic field in radio frequency  
87 identification (RFID) antennas, they provide the unprecedented ability to track  
88 individuals across years and life stages. Further, advances in the analytical tools,  
89 such as social network analysis <sup>29</sup> and community detection algorithms <sup>30</sup>, are  
90 facilitating greater insight into patterns of social structure. However, although  
91 technological advances have underpinned a boom in the study of animals' social  
92 networks <sup>31</sup>, much less effort has focused on identifying key mechanisms that form  
93 communities and shape social structure at the scale of populations.

94

95 In this paper, we investigate the patterns of individual movement and the resulting  
96 community structure in a large contiguous mixed population comprising 5 species  
97 of wild songbird over 4 winters [Farine et al *in prep.*]. We first quantify movements  
98 across the landscape across all four years to determine if individuals move evenly  
99 through space, or if there are consistent movement corridors. We determine  
100 whether preferred movement pathways are maintained across generations, and  
101 whether they are associated with understorey habitat density and the geometry of  
102 the woodland. Second, we use patterns of connections among individuals to  
103 construct social networks, and use these social networks to determine at what  
104 scales population social structure is most consistent across years. Doing so helps us  
105 to elucidate the relative importance of different potential drivers (both social and  
106 habitat) that underpin population social structure.

107

108 RESULTS

109

110 *Quantifying individual movements*

111 To determine whether individuals moved freely through Wytham Woods, or if  
112 movement patterns are shaped by features of the habitat, we first quantified the  
113 daily movement rates between different feeding stations. Our population consisted  
114 of a total of 5163 unique PIT-tagged individuals (see Methods), of which 3051 were



115 great tits (*Parus major*), 3960 were blue tits (*Cyanistes caeruleus*), 403 were marsh  
116 tits (*Poecile palustris*), 232 were coal tits (*Periparus ater*), and 110 were nuthatches  
117 (*Sitta europaea*). We detected the presence and group membership of birds using a  
118 grid of 65 bird feeders filled with unhusked sunflower seed, and studied the  
119 population over 4 winters.

120

121 We first created a movement network combining the data across all years (Figure 1,  
122 see methods). We found that the majority of movements (n=83071) occurred  
123 between feeding stations where more birds were present. However, not all birds  
124 followed the same patterns. First, we found that birds in their first winter made  
125 many more moves than adult birds: first year birds accounted for 61% of all  
126 movements despite making up only made up 38% of the population on average.  
127 Further, their movement networks included many more long-distance movements  
128 than those of adults (Figure 1), resulting in a significantly higher average movement  
129 distance (Figure S1). Second, we found that although great and blue tits exhibited  
130 similar movement patterns, marsh tit movements were typically much more  
131 localized (Figures S2, S3). Thus, age and species both affected the distribution of  
132 overall movements. These patterns suggest that many social processes, such as  
133 disease spread or information transmission (both within and between species) will  
134 be linked to demographic processes.

135

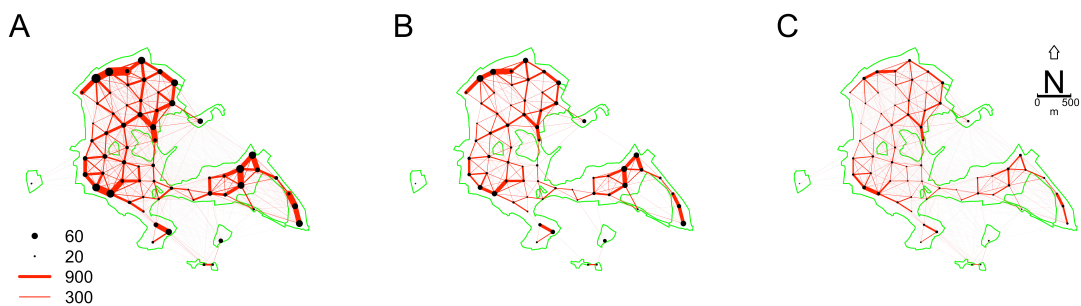

136

137 **Figure 1:** Total movements of (A) all birds, (B) adults, and (C) juveniles from all  
138 species over 4 winters of data. The thickness of each line represents the number of  
139 observations of a bird moving between the two feeding stations (black points) in the

140 same day. The size of the points represents the average number of individuals  
141 observed at each feeding station. The green outline represents the outline of  
142 Wytham Woods and four small external woodplots.  
143  
144 *Testing the predictors of movement propensity*  
145 Habitat structure is likely to shape movement patterns by birds during the winter in  
146 several ways. First, for arboreal species, individuals are more likely to move through  
147 the forest than over open ground, and thus the distance between foraging patches  
148 needs to be calculated through the forest and thus the presence of open areas is  
149 likely to have some impact on the spatial patterns of movements. Second, within the  
150 forest, the understory structure of the habitat could create preferred areas of  
151 movement by providing shelter from predators. Finally, additional factors such as  
152 local traditions could maintain consistent movement pathways, when generations  
153 mix and where social learning occurs. We compared the patterns of movement  
154 observed across years, and relate these to spatial distance and habitat features. To  
155 avoid the potential confounding effect of population density in our statistical  
156 analyses, we re-defined edges in the movement network as the probability that an  
157 individual detected at either site moves between them on a given day (see  
158 methods). Edge weights ranged from 0 representing no movement between  
159 adjacent sites to 0.83 representing that each individual detected had an 83% chance  
160 of moving between the two sites on a given day (Figure S4). For each pair of sites,  
161 we also estimated the density of understorey vegetation between them using data  
162 collected at 100m intervals throughout Wytham Woods<sup>32</sup> (see methods). Because  
163 Wytham Woods is unevenly shaped, we also calculated distance between feeding  
164 sites as *forest distance*, which is the shortest line without leaving boundaries of the  
165 forest. To enable direct comparison between each predictor variable, we scaled each  
166 predictor to zero mean and unit variance.  
167  
168 Weighted multiple regression quadratic assignment procedure (MRQAP)<sup>33</sup> revealed  
169 that the movements by birds between feeding stations were significantly more  
170 similar from year to year than expected by chance, even when accounting for forest

171 distance and habitat structure (see Table 1, Figure 2). In all years, birds were  
172 significantly more likely to move between ‘close’ feeding stations than distant ones,  
173 and were also more likely to move between feeders that were separated by higher  
174 understory habitat density. However, the propensity to move between feeders  
175 observed in previous years was consistently the strongest predictor of future  
176 movements. The coefficient values for movements predicted by the previous year  
177 are typically an order of magnitude larger than those of other predictor variables,  
178 suggesting that some undetected factors are driving patterns of movements by birds  
179 across this woodland. Because for many feeding stations the distance and forest  
180 distance are very similar (see Figure 2), we also tested whether birds were less  
181 likely to move between feeding sites that were separated non-forest by calculating  
182 the difference between forest distance and Euclidian distance. We found that birds  
183 moved less between feeders with a larger difference in distance (i.e. the path  
184 through the forest was much longer than the straight-line path), suggesting that  
185 birds are avoiding crossing open fields (Table 2).

186

187 **Table 1:** Results of multiple regression quadratic assignment procedure used to test  
188 whether previously observed patterns of movement (probability of moving between  
189 sites per capita), distance between sites (distance through the forest), and habitat  
190 density (percentage cover) between sites explain the observed patterns of  
191 movement. Bold values represent significant coefficients, \* represents significance  
192 at  $P < 0.01$ , \*\* represents significance at  $P < 0.001$ . All variables are scaled to 0 mean  
193 and unit variance to enable comparison between effect sizes.

194

| Year | Previous Year  | Forest Distance | Habitat Density |
|------|----------------|-----------------|-----------------|
| 2013 | <b>0.903**</b> | <b>-0.028*</b>  | -0.010          |
| 2014 | <b>0.877**</b> | <b>-0.060**</b> | -0.010          |
| 2015 | <b>0.787**</b> | <b>-0.091**</b> | -0.019          |

195

196

197

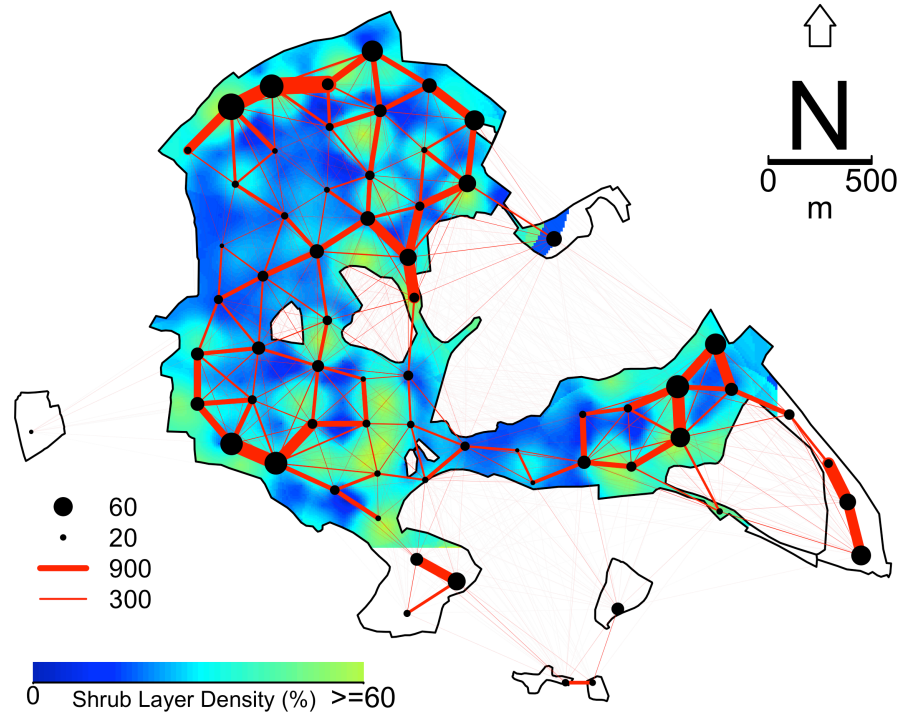

198

199 **Figure 2:** Total movement of all birds (from Figure 1A) overlaid on the shrub layer  
200 density (0.5m to 2.5m above ground). Areas with a white background have no  
201 habitat data available.

202

203 **Table 2:** Results of multiple regression quadratic assignment procedure used to test  
204 whether birds moved less between feeding sites separated by open space. For each  
205 pair of sites, we calculated the difference between the forest distance and the  
206 Euclidian distance. Bold values represent significant coefficients, \* represents  
207 significance at  $P < 0.01$ , \*\* represents significance at  $P < 0.001$ . All variables are  
208 scaled to 0 mean and unit variance to enable comparison between effect sizes.

209

| Year | Previous Year  | Relative Distance |
|------|----------------|-------------------|
| 2013 | <b>0.919**</b> | -0.001            |
| 2014 | <b>0.906**</b> | <b>-0.019*</b>    |
| 2015 | <b>0.828**</b> | <b>-0.029*</b>    |

210

211

212

213

214 *Quantifying community structure*

215 Population-level social structure can have significant implications for population  
216 processes. For example, high levels of clustering can reduce the spread of disease  
217 within populations<sup>34</sup>. Thus far, we have shown that both social and habitat features  
218 are likely to contribute to where animals move. Here we investigate how these  
219 patterns contribute to the emergent structure of the population. From the  
220 detections of individuals at feeding stations, we inferred flock membership and  
221 social network structure (see methods) using well established approaches  
222 developed for this population<sup>7, 12, 13, 14, 29, 35, 36, 37, 38</sup>. We then inferred communities in  
223 the social networks using the edge betweenness community detection algorithm in  
224 the R package *igraph*<sup>39</sup>, and explored the between-year stability of individual co-  
225 membership to the same community (see Methods).

226

227 To investigate population social structure at different scales, we cut the social  
228 network into  $k$  communities, where ranged from 2 to 65 (the latter representing the  
229 total number of locations with a feeding station). If communities are structured  
230 exclusively by extrinsic factors, we expected a drop in the stability of co-membership  
231 by individuals as we created more fine-scale communities. For example, if a  
232 population is spread across three isolated patches of woodland, then we expect that  
233 birds will always occur within the same three communities (one for each woodland)  
234 each year. By contrast, if communities are structured socially, then we expected  
235 smaller communities (local cliques) to be more stable. For example, for a territorial  
236 pair-living species living in a lattice-like uniform environment, an algorithm will be  
237 able to isolate each pair when identifying  $k=N/2$  communities, whereas the  
238 communities detected for smaller  $k$  values will be essentially random. When applied  
239 to our social network data, we uncovered two scales that maximized the propensity  
240 for pairs of individuals that were observed in the same community to be re-  
241 observed in the same community in the following year. When social networks were  
242 partitioned into 2 or 3 communities (Figure 3), individuals observed in the same  
243 community in one year and observed again in the following year re-occurred in the  
244 same community approximately 90% of the time. These communities largely



245 represent the geometry of Wytham Woods, with two core habitats (north-west and  
246 the east), and a small wood to the south that is only attached by a narrow neck of  
247 vegetation representing a third community.  
248

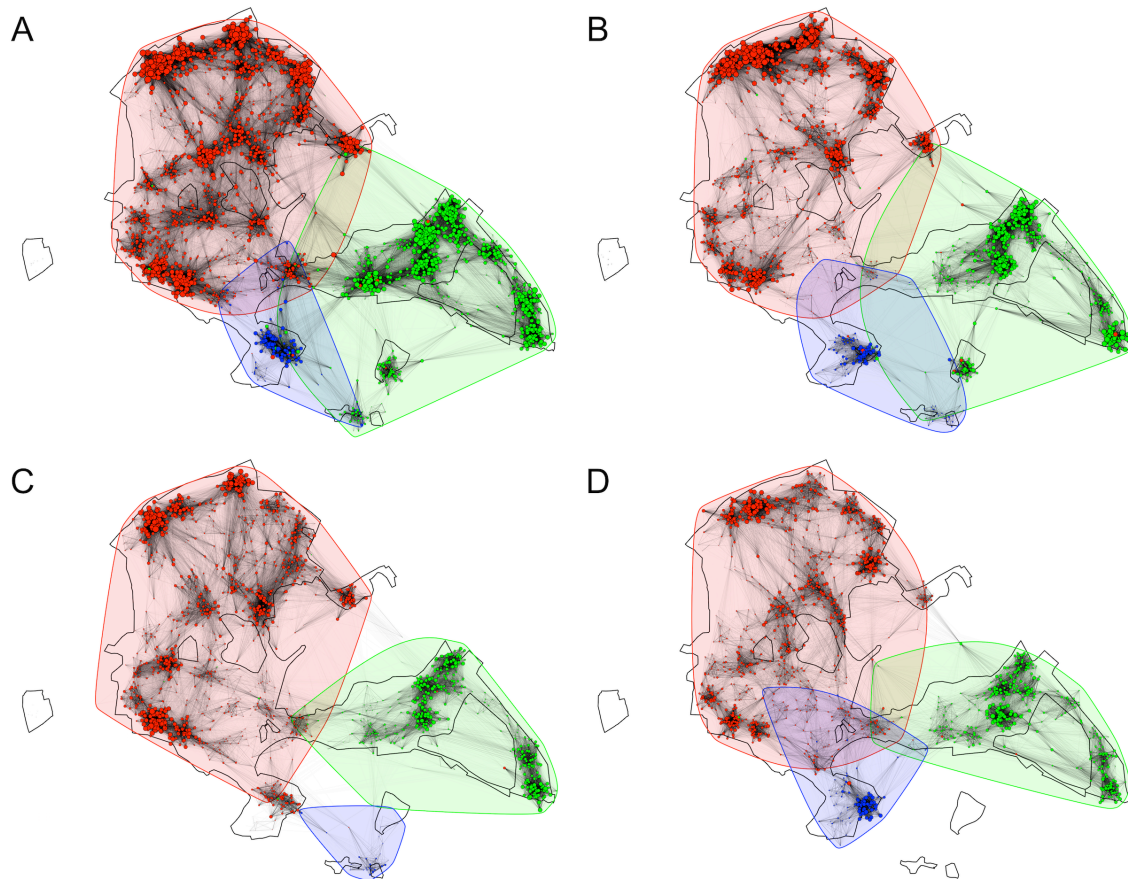

249  
250 **Figure 3:** The probability that two birds observed in the same community in one  
251 year remain in the same community in the following year, given that both are  
252 observed. The probability is calculated with the social network partitioned into the  
253 same specified number of communities (2 to 65) in all years.

254  
255 Specifying the algorithm to detect 4 communities significantly decreased the  
256 probability of individuals being re-observed in the same community (no overlap in  
257 the 95% confidence intervals in Figure 4), suggesting that there is no stable 4<sup>th</sup>  
258 community. Partitioning the network further by specifying the algorithm to detect  
259 more than 4 communities then increased probability that two individuals occurring

260 in the same community in one year and both observed in the following year again  
261 re-occurred in the same community. Thus, the patterns of social organization at  
262 both the population scale (2-3 communities) and at a local scale (>50 communities)  
263 were extremely stable year-to-year. This result suggest that multiple levels of  
264 community structure exist in this population. Partitioning the network into larger  
265 number of communities did not result in one community per feeding station, instead  
266 several large communities were maintained and many small ones were created  
267 (Figure 5). Finally, we found no evidence that the composition of species in  
268 communities changed based on how many communities were created (Figure S5).  
269 Thus, the partitioning of the network into more (smaller) communities did not  
270 segregate individuals into species-specific clusters, and so stable community  
271 structure at a local scale was not explained by simple species-level processes.  
272

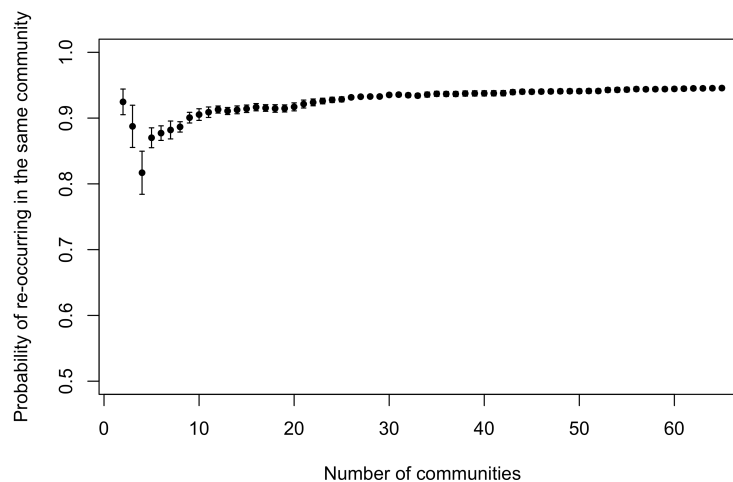

273  
274 **Figure 4:** The social network for each year of the study partitioned into 3  
275 communities. Each point represents one individual, and its colour represents the  
276 community it is assigned into. The size of each point represents its weighted degree  
277 (larger points have more and/or stronger connections to other individuals). Points  
278 are drawn at the average location that the individual was observed, with a small  
279 amount of jittering added to reduce the overlap between individuals observed in the  
280 same location.  
281

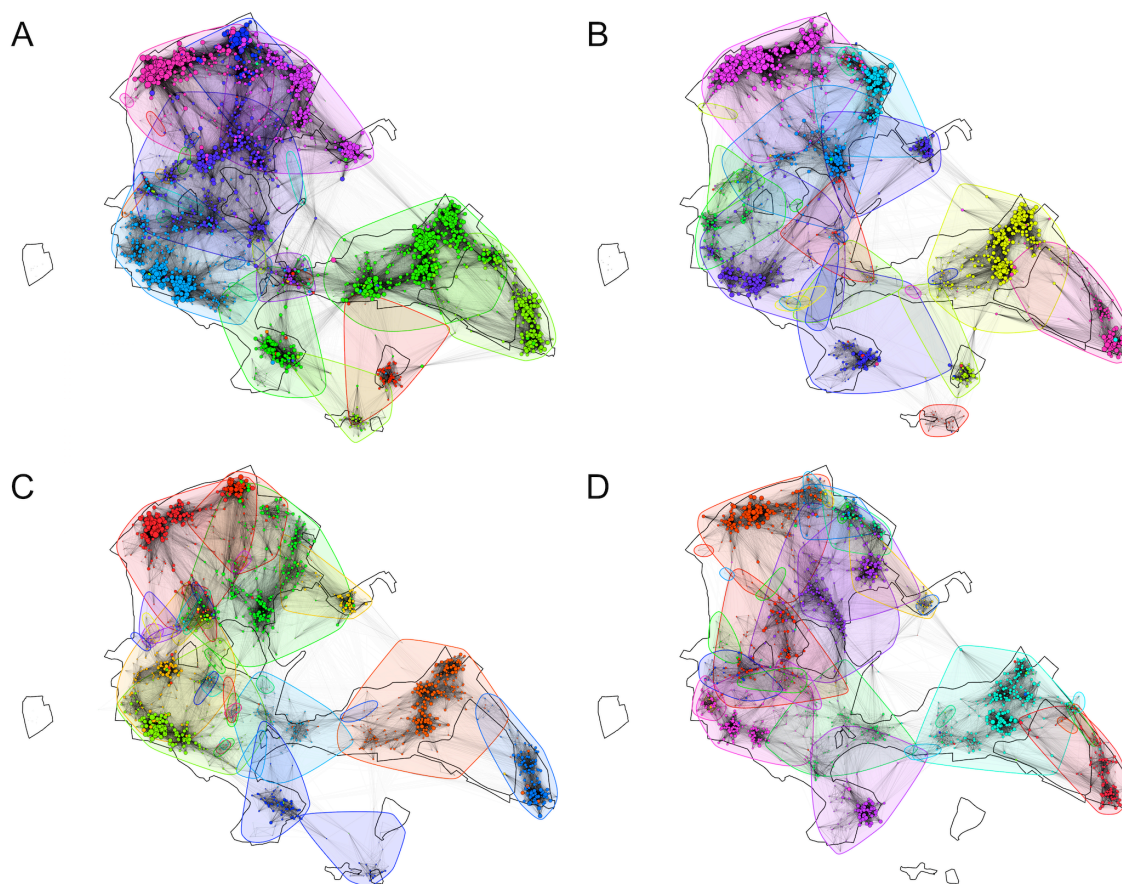

282

283 **Figure 5:** The social network for each year of the study partitioned into 65  
284 communities. Each point represents one individual, and its colour represents the  
285 community it is assigned into. The size of each point represents its weighted degree  
286 (larger points have more and/or stronger connections to other individuals). Points  
287 are drawn at the average location that the individual was observed, with a small  
288 amount of jittering added to reduce the overlap between individuals observed in the  
289 same location.

290

### 291 *Linking movement patterns to community structure*

292 What drives the consistent patterns of community structure in the social network of  
293 this population? Understanding how communities emerge in the social networks is  
294 important for determining which behaviours (i.e. mechanisms) group-living could  
295 act on as agents of selection. Uncovering the processes that drive community  
296 structure becomes notably more complex when studying species where individuals



297 form fission-fusion groups, as no single individual is likely to be responsible for the  
298 global patterns of connection. Instead social structure arises from the interactions  
299 among all individuals taken together. One plausible mechanism that is likely to  
300 underpin some aspects of community structure is the patterns of movements.  
301 Individuals living at two locations with frequent movements of individuals between  
302 them will be more likely to be connected in the social network, and therefore more  
303 likely to be in the same community and share similar social environments.

304

305 We investigate whether the regular movements of individuals between particular  
306 feeding stations are responsible for global community structure (see Methods). We  
307 found that when we partitioned the network into few communities, the individuals  
308 at feeding stations connected by many movements occurring were very likely to be  
309 allocated to the same community (Figure 6). This supports our hypothesis that the  
310 extrinsic habitat features shape the broad patterning of the community (i.e. the  
311 presence of 2-3 distinct clusters of individuals, see Figure 3). However, at more local  
312 scale, we found that the assortativity coefficient decreased (Figure 6). Thus, as the  
313 social network is partitioned into more communities, movements between sites  
314 explained less of the community structure, despite the fact that individuals become  
315 more likely to re-occur in the same communities across years (see Figure 4).

316

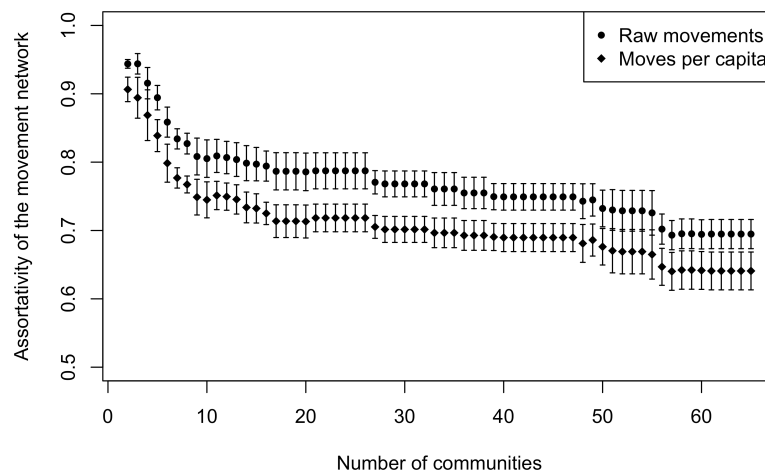

317

318 **Figure 6:** The correlation of movements between feeding stations and community  
319 structure decreases with increasing numbers of communities. Each feeding station  
320 is allocated to the community in which the majority of individuals are members and  
321 used as a trait value to calculate assortment using the raw movement networks  
322 (Figure 1A) and the per capita movement network (Figure S2A). High values  
323 represent stronger connections between feeding stations in the same community.

324

325

326 DISCUSSION

327

328 Our study revealed two levels of social structure in a large community of wild birds  
329 containing several thousands of individuals from five species. At a broad scale, the  
330 social network contained two to three communities that were easily predicted by  
331 the regular movement paths used by birds. The movement of birds through the  
332 woodland were repeatable each year, but the similarity in movements across years  
333 was only partly by the geometry of the study area and fine-scale variation in habitat  
334 structure. Our results suggest that some other processes, potentially social  
335 processes such as local traditions<sup>12, 40</sup>, may also be involved. If that is the case, then  
336 broad-scale social structure could be, in part, the result of a socially-transmitted  
337 inter-generational effect. At a more local scale, we found highly stable social  
338 structure, with local clusters of individuals from all five species re-associating each  
339 year to maintain consistent communities. Our study highlights how multiple factors  
340 shape the social ecology in a population of wild birds.

341

342 The link between extrinsic habitat factors and community structure in animal  
343 populations has been investigated before. For example, community and sub-  
344 community structure in Galapagos sealions *Zalophus worrebaeki* are largely driven  
345 by the structure of male territories<sup>41</sup>. However, territorial behaviours are unlikely  
346 to play a major role in structuring the winter population of birds in Wytham Woods  
347 because the majority of individuals were great tits and blue tits, which are both non-  
348 territorial during the winter. In non-territorial wintering golden-crowned sparrows

349 (*Zonotrichia atricapilla*), social network communities were also found to be more  
350 structured than expected given the spatial overlap in the home-range of birds <sup>42</sup>. The  
351 surprising aspect from that study is that golden-crowned sparrows maintain a  
352 stable community structure in their wintering range despite having migrated a long  
353 distance from their breeding areas. The phenomenon observed in both tits and  
354 sparrows suggests that winter sociality is likely to play an important role that goes  
355 beyond simple group size effects, and thus could have carry-over effects into  
356 breeding performance in the following spring (e.g. <sup>7</sup>).

357  
358 A potentially important feature that we extracted in our study was differential  
359 movement patterns between classes of individuals. We found that juveniles typically  
360 made more long-distance movements than adults. This pattern, which is likely to  
361 arise from juvenile dispersal behaviour, has a number of implications for social  
362 processes. To overcome strong seasonal changes in the environment, juvenile tits  
363 rely on learning from adults <sup>43</sup>. As they move through the landscape, juveniles copy  
364 the adults in their local environment, and a recent study demonstrated that tits  
365 exhibit a strong conformist (copy the local majority) social learning strategy <sup>12</sup>.  
366 However, stability in local community structure means that local traditions  
367 (behaviours that differ among different social groups in a population) can easily  
368 become entrenched <sup>12</sup>. Juveniles could therefore play an important role in  
369 facilitating transfer of new information into social groups. At the same time,  
370 juveniles are likely to come into contact with a greater number of individuals, and  
371 thus could play an important role in spreading diseases or pathogens across  
372 communities (as suggested in humans <sup>44</sup>).

373  
374 By investigating the stability of community structure at different scales, we found  
375 evidence that tits in Wytham Woods live in a multi-level community structure.  
376 Multi-level community structure occurs when animals form small groups, or  
377 clusters, of individuals with whom they associate most strongly, and a larger groups  
378 composed of individuals with whom they associate loosely or indirectly. There is  
379 increasing interest in multi-level community structure as it can have major

380 implications for how social processes occur<sup>45, 46, 47, 48</sup>. Multiple factors can shape the  
381 movement (or not) of individuals among social units. These factors can be broadly  
382 split into two categories: social factors (such as relatedness<sup>49, 50, 51</sup>, cultural  
383 similarity<sup>52</sup>, or species identity<sup>45</sup>) and habitat factors (features of the environment  
384 that modulate how individuals move, and thus whom they encounter). Although  
385 recent studies have begun teasing apart social versus habitat factors that determine  
386 the patterns of contact among individuals with different phenotypic characteristics  
387<sup>37</sup>, little is known what drives the emergence of global population-level structure.  
388 Cantor et al<sup>52</sup> recently used simulations to suggest that multi-level communities can  
389 emerge when individual segregate into clans formed around similar cultural  
390 behaviours. In our study, we found evidence that both habitat and social factors  
391 contribute to multi-level community structure. The general geometry of Wytham  
392 Woods introduced a repeatable set of large-scale communities (Figure 3).  
393 Environmental features (notably habitat density) that promote or hinder movement  
394 by individuals (Figure 2) can shape whom individuals encounter. Together, these  
395 features are likely to play a major role in how the population is broadly structured.  
396 In addition, by studying birds that form mixed-species communities, our study  
397 highlights that complex interaction patterns, such as associations among kin or  
398 cooperation, are not pre-requisites for multi-level structure to emerge. Instead,  
399 social mechanisms, such as social preference<sup>37</sup> and phenotypic drivers<sup>35</sup>, determine  
400 who individuals affiliate with, while the woodland geometry and habitat density  
401 determine who individuals can come into contact with.

402

403 The presence of multi-level community structure can have implications for  
404 evolutionary dynamics of populations. First, restricted movement can reduce gene  
405 flow and lead to divergence in the evolutionary trajectories of sub-parts of each  
406 population. Garant et al.<sup>24</sup> demonstrated that differential dispersal reinforces local  
407 variation in selection for nestling body mass. In their study, they found that trends  
408 in genotypic variance for body mass in nestlings were very different in the eastern  
409 sectors of Wytham Woods and the northern sectors. These two areas represent the  
410 two largest population-level communities we found in our study. Second,

411 individuals in the same community will have more similar social environments than  
412 individuals occurring in different communities. Thus, any social effects arising via  
413 the social environment, such as indirect genetic effects<sup>53</sup>, could accelerate patterns  
414 of divergence within single populations. Finally, the social environment itself can act  
415 as an agent of selection<sup>18,54</sup>, and therefore processes that shape social structure are  
416 likely to impact the overall strength and direction of selection experienced by  
417 populations.

418

419 Together the findings from our study highlight how stable social structure can be  
420 maintained in populations as a consequence of both social affiliations and features  
421 of the habitat that individuals live in. The combination of strong clustering together  
422 with some random movements in networks can facilitate the spread of disease or  
423 information through the network<sup>34</sup>. This prediction is supported by evidence from  
424 the rapid spread of a recent disease<sup>55</sup> and of novel traditions<sup>12</sup> in this population.  
425 At the same time, consistent population social structure can lead to phenotypic and  
426 genotypic divergence<sup>24</sup>, with potential implications for how animals can adapt to  
427 changing environmental conditions. Integrating information about animal social  
428 structure with data on both pulse and long-term selective events could yield novel  
429 insights into the evolution of social behaviour. However, as our study highlights,  
430 determining the capacity for populations to respond to selective pressures will  
431 require an understanding of a range of different drivers shaping their social  
432 structure.

433

434

## 435 DATA COLLECTION METHODS

436

### 437 *Study location, study species, and population dynamics*

438 The study was undertaken in Wytham Woods, Oxfordshire, UK (51° 46' N, 01° 20'  
439 W), a 385ha area of broadleaf deciduous woodland surrounded by open farmland.  
440 Pairs of birds hold territories during the breeding season (April – June), but form  
441 loose fission-fusion groups during the winter, flocking with unrelated individuals

442 that forage for ephemeral food sources. Flocks often contain multiple species<sup>38</sup>, and  
443 our study also includes data on the five most common flocking species: blue tits,  
444 marsh tits, coal tits, and nuthatches. Tits are generally short-lived—great tits have a  
445 mean life span of 1.9 years. This short generation time results in high annual  
446 population turn-over and inter-annual variation in population sizes. Very good  
447 breeding conditions lead to large population sizes, whereas poor breeding  
448 conditions result in fewer juveniles and a much reduced population size.

449

#### 450 *Understorey habitat density*

451 We used data from Kirby et al.<sup>32</sup> to quantify the habitat structure between each  
452 feeding site. In that study, the authors recorded, among other measures, the shrub  
453 cover density (0.5m to 2.5m above ground) along the diagonal of 164 different 10m  
454 x 10m quadrats equally spaced throughout Wytham Woods. Here we use data from  
455 the 2012 census, which falls roughly in the middle of our study period. To  
456 extrapolate from the 164 sites, we generated a surface plot where we extrapolated  
457 the data to a 10 x 10m grid of points. The resulting figure accurately captures  
458 variation in habitat density based on our knowledge of the study site. To calculate  
459 habitat density between each pair of feeding sites, we calculated the mean habitat  
460 density along a 20m-wide transect connecting the two sites.

461

#### 462 *PIT-tagging birds*

463 All birds in the study were caught in either a nest box (as parents and as chicks) or a  
464 mist-net (approximately half the population are birds that immigrate). Each bird  
465 was fitted with uniquely numbered British Trust for Ornithology metal leg ring, and  
466 a uniquely-coded passive integrated transponder (PIT) tag (IB Technologies, UK)  
467 that was fully enclosed in a molded plastic ring fitted to the other leg. Each PIT tag  
468 contains a unique code that can be recorded by antennae (see next section), and  
469 these were then matched to the bird's ring number. We ceased fitting PIT tags to  
470 coal tits from October 2012 as the tags were aggravating pox lesions on birds legs  
471 during a naturally-occurring epidemic. For each bird that was caught and tagged, we  
472 recorded the age and sex (where possible following<sup>56</sup>).

473

474 *Data collection*

475 We placed 65 automated feeding stations in a evenly-spaced grid covering the  
476 entirety of Wytham Woods and small isolated patches of woodland nearby.  
477 Commercial bird feeders (Jacoby Jayne, UK) were fitted with a radio frequency  
478 identification (RFID) antenna on each of the lower two access holes and other access  
479 holes were blocked. The antennae recorded the unique PIT tag code, time and date  
480 for each visit by a marked bird. For the duration of the study, the feeding stations  
481 were scheduled to open and begin logging at 6am on Saturday mornings, and shut  
482 after dusk on Sunday evening. Feeders were in place December to February in the  
483 winter 2011-12 (13 weeks), from December to early March of winters 2012-13 and  
484 2013-14 (14 weeks each), and for January and February in the winter of 2014-15 (8  
485 weeks). This data collection resulted in 49 unique weekends and 98 complete data  
486 logging days over the 4 winters. In latter years, 6 feeders covering two external sites  
487 were replaced for a separate experiment, and thus the data were not included in  
488 these analyses.

489

490 *Inferring flocks and flock membership*

491 The data logged from the PIT tag detections produces bursts of detections in the  
492 temporal data stream. These vary in length depending on the size of the flocks  
493 present which increases during the course of the day,<sup>57</sup>. We used a recently-  
494 developed statistical method called Gaussian Mixture Models<sup>58</sup> to extract the start  
495 and end times for each distinct flock. This machine-learning method statistically fits  
496 Gaussian curves of varying sizes to each burst in the data and allocates each record  
497 to the distribution, or 'gathering event', into which it falls. Gaussian Mixture Models  
498 provide a more robust estimation of the social network structure than alternative  
499 methods<sup>59</sup>.

500

501 *Constructing movement networks*

502 From the logging data, we recorded every case of movement by a bird from one  
503 feeding station to another within the same day (a total of 83071 movements over 4



504 winters), and used these to create movement networks that quantify the  
505 connectedness between each pair of feeding stations in the study. We used daily  
506 sequential detections to maximize our chances of correctly inferring direct  
507 movement pathway (e.g. moving between locations A and D via locations B and C)  
508 and minimizing our chances of incorrectly inferring movement pathways (e.g.  
509 estimating only a direct movement between A and D). Because the number of  
510 movements are inherently linked to number of individuals present at a specific pair  
511 of feeders, we also created a network describing the rate of movement between  
512 feeders, where the rate was defined as the probability that an individual at one focal  
513 feeder would be observed moving to the other focal feeder within a day.

514

#### 515 *Constructing social networks*

516 We defined edges in the social network using the simple ratio index:  $E_{AB} =$   
517  $\frac{x}{x+y_{AB}+y_A+y_B}$ , where  $E_{AB}$  is the edge weight between individuals  $A$  and  $B$ ,  $x$  is the  
518 number of times they were detected in the same flock,  $y_{AB}$  is the number of  
519 occasions they were both detected at the same time but not in the same flock,  $y_A$  is  
520 the number of detections of  $A$  where  $B$  was not seen, and  $y_B$  is the number of  
521 detections of  $B$  where  $A$  was not seen. The networks for each year were constructed  
522 using *R* package *asnipe* <sup>60</sup>.

523

#### 524 *Linking movements to community structure*

525 For each year's social network, we first split the network by specifying  $k = 2$  to 65  
526 communities (see main text). For each value of  $k$ , we allocated individuals to their  
527 most common feeder, and for each of the feeding stations, select the community that  
528 the majority of individuals present were members of. This enabled us to create a  
529 community label for each feeding station (and for each value of  $k$ ), and link these to  
530 the network formed by the movement of individuals (Figure 1). To test whether the  
531 movement network shaped the community structure in the network for a given  
532 value of  $k$ , we quantified the assortativity coefficient of the network using  
533 communities as discrete trait values <sup>61,62</sup>. Assortativity is the measure of how well



534 connected alike nodes are compared to how well connected dislike nodes are,  
535 ranging from 1 (all edges connect nodes with the same traits) to -1 (all edges  
536 connect nodes with different traits).

537

## 538 REFERENCES

539

- 540 1. Dall SRX, *et al.* Information and its use by animals in evolutionary ecology.  
541 *Trends in Ecology and Evolution* **20**, 187-193 (2005).  
542
- 543 2. Seppanen JT, Forsman JT, Monkkonen M, Thomson RL. Social information use  
544 is a process across time, space, and ecology, reaching heterospecifics. *Ecology*  
545 **88**, 1622-1633 (2007).  
546
- 547 3. Valone TJ. From eavesdropping on performance to copying the behavior of  
548 others: a review of public information use. *Behav Ecol Sociobiol* **62**, 1-14  
549 (2007).  
550
- 551 4. Aplin LM, Farine DR, Mann RP, Sheldon BC. Individual-level personality  
552 influences social foraging and collective behaviour in wild birds. *Proc R Soc B*  
553 **281**, 20141016 (2014).  
554
- 555 5. Pruitt JN, Keiser CN. The personality types of key catalytic individuals shape  
556 colonies' collective behaviour and success. *Anim Behav* **93**, 87-95 (2014).  
557
- 558 6. Pruitt JN, Riechert SE. How within-group behavioural variation and task  
559 efficiency enhance fitness in a social group. *Proc R Soc B* **278**, 1209-1215  
560 (2011).  
561
- 562 7. Farine DR, Sheldon BC. Selection for territory acquisition is modulated by  
563 social network structure in a wild songbird. *J Evolution Biol* **28**, 547-556  
564 (2015).  
565
- 566 8. Formica VA, *et al.* Phenotypic Assortment Mediates the Effect of Social  
567 Selection in a Wild Beetle Population. *Evolution* **65**, 2771-2781 (2011).  
568
- 569 9. Formica VA, *et al.* Fitness consequences of social network position in a wild  
570 population of forked fungus beetles (*Bolitotherus cornutus*). *J Evolution Biol*  
571 **25**, 130-137 (2012).  
572
- 573 10. Wey TW, Burger JR, Ebensperger LA, Hayes LD. Reproductive correlates of  
574 social network variation in plurally breeding degus (*Octodon degus*). *Anim*  
575 *Behav* **85**, 1407-1414 (2013).  
576

- 577 11. Allen J, Weinrich M, Hoppitt W, Rendell L. Network-Based Diffusion Analysis  
578 Reveals Cultural Transmission of Lobtail Feeding in Humpback Whales.  
579 *Science* **340**, 485-488 (2013).  
580
- 581 12. Aplin LM, *et al.* Experimentally induced innovations lead to persistent culture  
582 via conformity in wild birds. *Nature* **518**, 538-541 (2015).  
583
- 584 13. Aplin LM, Farine DR, Morand-Ferron J, Sheldon BC. Social networks predict  
585 patch discovery in a wild population of songbirds. *Proc R Soc B* **279**, 4199-  
586 4205 (2012).  
587
- 588 14. Farine DR, Aplin LM, Sheldon BC, Hoppitt W. Interspecific social networks  
589 promote information transmission in wild songbirds. *Proc R Soc B* **282**,  
590 20142804 (2015).  
591
- 592 15. Adelman JS, Moyers SC, Farine DR, Hawley DM. Feeder use predicts both  
593 acquisition and transmission of a contagious pathogen in a North American  
594 songbird. *Proc R Soc B* **282**, 20151429 (2015).  
595
- 596 16. VanderWaal KL, Atwill ER, Isbell LA, McCowan B. Linking social and pathogen  
597 transmission networks using microbial genetics in giraffe (*Giraffa*  
598 *camelopardalis*). *J Anim Ecol* **83**, 406-414 (2013).  
599
- 600 17. Pruitt JN, Goodnight CJ. Site-specific group selection drives locally adapted  
601 group compositions. *Nature* **514**, 359-362 (2014).  
602
- 603 18. Farine DR, Montiglio PO, Spiegel O. From individuals to groups and back: the  
604 evolutionary implications of group phenotypic composition. *Trends Ecol Evol*  
605 **30**, 609-621 (2015).  
606
- 607 19. Goodale E, *et al.* Interspecific information transfer influences animal  
608 community structure. *Trends in Ecology and Evolution* **25**, 354-361 (2010).  
609
- 610 20. Kurvers RHJM, *et al.* The evolutionary and ecological consequences of animal  
611 social networks: emerging issues. *Trends Ecol Evol* **29**, 326-335 (2014).  
612
- 613 21. Farine DR. Proximity as a proxy for interactions: issues of scale in social  
614 network analysis. *Anim Behav* **104**, e1-e5 (2015).  
615
- 616 22. Brockmann D, Helbing D. The Hidden Geometry of Complex, Network-Driven  
617 Contagion Phenomena. *Science* **342**, 1337-1342 (2013).  
618
- 619 23. Leu ST, *et al.* Environment modulates population social structure:  
620 experimental evidence from replicated social networks of wild lizards. *Anim*  
621 *Behav*, (in press).  
622

- 623 24. Garant D, *et al.* Evolution driven by differential dispersal within a wild bird  
624 population. *Nature* **433**, 60-65 (2005).  
625
- 626 25. Kays R, Crofoot MC, Jetz W, Wikelski M. Terrestrial animal tracking as an eye  
627 on life and planet. *Science* **348**, aaa2478 (2015).  
628
- 629 26. Krause J, *et al.* Reality mining of animal social systems. *Trends Ecol Evol* **28**,  
630 541-551 (2013).  
631
- 632 27. Strandburg-Peshkin A, Farine DR, Couzin ID, Crofoot MC. Shared decision-  
633 making drives collective movement in wild baboons. *Science* **348**, 1358-1361  
634 (2015).  
635
- 636 28. Bonter DN, Bridge ES. Applications of radio frequency identification (RFID) in  
637 ornithological research: a review. *J Field Ornithol* **82**, 1-10 (2011).  
638
- 639 29. Farine DR, Whitehead H. Constructing, conducting, and interpreting animal  
640 social network analysis. *J Anim Ecol* **84**, 1144-1163 (2015).  
641
- 642 30. Fortunato S. Community detection in graphs. *Phys Rep* **486**, 75-174 (2010).  
643
- 644 31. Krause J, James R, Franks DW, Croft DP. *Animal Social Networks*. Oxford  
645 University Press (2015).  
646
- 647 32. Kirby KJ, *et al.* Changes in the tree and shrub layer of Wytham Woods  
648 (Southern England) 1974-2012: local and national trends compared. *Forestry*  
649 **87**, 663-673 (2014).  
650
- 651 33. Dekker D, Krackhardt D, Snijders T. Sensitivity of MRQAP tests to collinearity  
652 and autocorrelation conditions. *Psychometrika* **72**, 563-581 (2007).  
653
- 654 34. Eames KTD. Modelling disease spread through random and regular contacts  
655 in clustered populations. *Theor Popul Biol* **73**, 104-111 (2008).  
656
- 657 35. Aplin LM, *et al.* Individual personalities predict social behaviour in wild  
658 networks of great tits (*Parus major*). *Ecol Lett* **16**, 1365-1372 (2013).  
659
- 660 36. Aplin LM, *et al.* Consistent individual differences in the social phenotypes of  
661 wild great tits (*Parus major*). *Anim Behav* **108**, 117-127 (2015).  
662
- 663 37. Farine DR, *et al.* The role of social and ecological processes in structuring  
664 animal populations: a case study from automated tracking of wild birds. *Roy  
665 Soc Open Sci* **2**, 150057 (2015).  
666

- 667 38. Farine DR, Garroway CJ, Sheldon BC. Social network analysis of mixed-  
668 species flocks: exploring the structure and evolution of interspecific social  
669 behaviour. *Anim Behav* **84**, 1271-1277 (2012).  
670
- 671 39. Csardi G, Nepusz T. The igraph software package for complex network  
672 research. *InterJournal Complex Systems*, 1695 (2006).  
673
- 674 40. Mueller T, *et al.* Social Learning of Migratory Performance. *Science* **341**, 999-  
675 1002 (2013).  
676
- 677 41. Wolf JBW, Mawdsley D, Trillmich F, James R. Social structure in a colonial  
678 mammal: unravelling hidden structural layers and their foundations by  
679 network analysis. *Anim Behav* **74**, 1293-1302 (2007).  
680
- 681 42. Shizuka D, *et al.* Across-year social stability shapes network structure in  
682 wintering migrant sparrows. *Ecol Lett* **17**, 998-1007 (2014).  
683
- 684 43. Slagsvold T, Wiebe KL. Learning the ecological niche. *Proc R Soc B* **274**, 19-23  
685 (2007).  
686
- 687 44. Del Valle SY, Hyman JM, Hethcote HW, Eubank SG. Mixing patterns between  
688 age groups in social networks. *Soc Networks* **29**, 539-554 (2007).  
689
- 690 45. Bell HL, Ford HA. A Comparison of the Social-Organization of 3 Syntopic  
691 Species of Australian Thornbill, *Acanthiza*. *Behav Ecol Sociobiol* **19**, 381-392  
692 (1986).  
693
- 694 46. de Silva S, Wittemyer G. A Comparison of Social Organization in Asian  
695 Elephants and African Savannah Elephants. *Int J Primatol* **33**, 1125-1141  
696 (2012).  
697
- 698 47. Grueter CC, Matsuda I, Zhang P, Zinner D. Multilevel Societies in Primates and  
699 Other Mammals: Introduction to the Special Issue. *Int J Primatol* **33**, 993-  
700 1001 (2012).  
701
- 702 48. Whitehead H, *et al.* Multilevel Societies of Female Sperm Whales (*Physeter*  
703 *macrocephalus*) in the Atlantic and Pacific: Why Are They So Different? *Int J*  
704 *Primatol* **33**, 1142-1164 (2012).  
705
- 706 49. Archie EA, Moss CJ, Alberts SC. The ties that bind: genetic relatedness  
707 predicts the fission and fusion of social groups in wild African elephants. *Proc*  
708 *R Soc B* **273**, 513-522 (2006).  
709
- 710 50. Croft DP, *et al.* The role of relatedness in structuring the social network of a  
711 wild guppy population. *Oecologia* **170**, 955-963 (2012).  
712

- 713 51. Godfrey SS, *et al.* A contact based social network of lizards is defined by low  
714 genetic relatedness among strongly-connected individuals. *Anim Behav* **97**,  
715 35-43 (2014).  
716
- 717 52. Cantor M, *et al.* Multilevel animal societies can emerge from cultural  
718 transmission. *Nature Communications* **6**, (2015).  
719
- 720 53. Moore AJ, Brodie ED, Wolf JB. Interacting phenotypes and the evolutionary  
721 process .1. Direct and indirect genetic effects of social interactions. *Evolution*  
722 **51**, 1352-1362 (1997).  
723
- 724 54. Wolf JB, Moore AJ. Interacting Phenotypes and Indirect Genetic Effects. In:  
725 *Evolutionary Behavioral Ecology* (ed<sup>^</sup>(eds Westneat DF, Fox CW). Oxford  
726 University Press (2010).  
727
- 728 55. Lachish S, Lawson B, Cunningham AA, Sheldon BC. Epidemiology of the  
729 Emergent Disease Paridae pox in an Intensively Studied Wild Bird  
730 Population. *Plos One* **7**, (2012).  
731
- 732 56. Svensson L. *Identification Guide to European Passerines*, 4th edition edn. BTO  
733 (1992).  
734
- 735 57. Farine DR, Lang SDJ. The early bird gets the worm: foraging strategies of wild  
736 songbirds lead to the early discovery of food sources. *Biol Letters* **9**,  
737 20130578 (2013).  
738
- 739 58. Psorakis I, Roberts SJ, Rezek I, Sheldon BC. Inferring social network structure  
740 in ecological systems from spatio-temporal data streams. *J R Soc Interface* **9**,  
741 3055-3066 (2012).  
742
- 743 59. Psorakis I, *et al.* Inferring social structure from temporal data. *Behav Ecol*  
744 *Sociobiol* **69**, 857-866 (2015).  
745
- 746 60. Farine DR. Animal Social Network Inference and Permutations for Ecologists  
747 in R using asnipe. *Methods Ecol Evol* **4**, 1187-1194 (2013).  
748
- 749 61. Farine DR. Measuring phenotypic assortment in animal social networks:  
750 weighted associations are more robust than binary edges. *Anim Behav* **89**,  
751 141-153 (2014).  
752
- 753 62. Shizuka D, Farine DR. Measuring the robustness of network community  
754 structure using assortativity. *Anim Behav* **122**, 237-246 (2016).  
755  
756  
757

**A**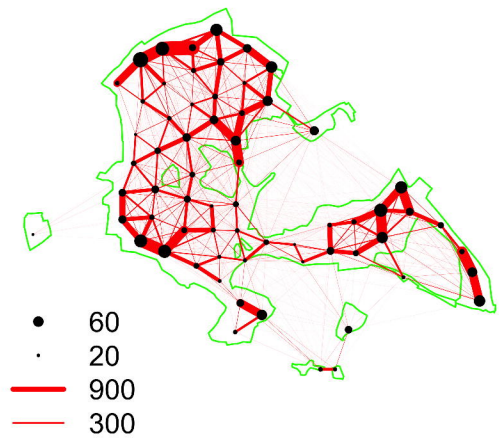**B**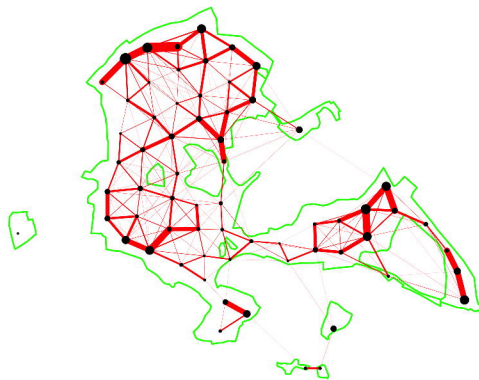**C**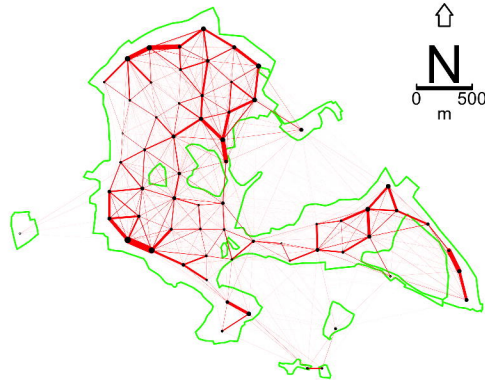

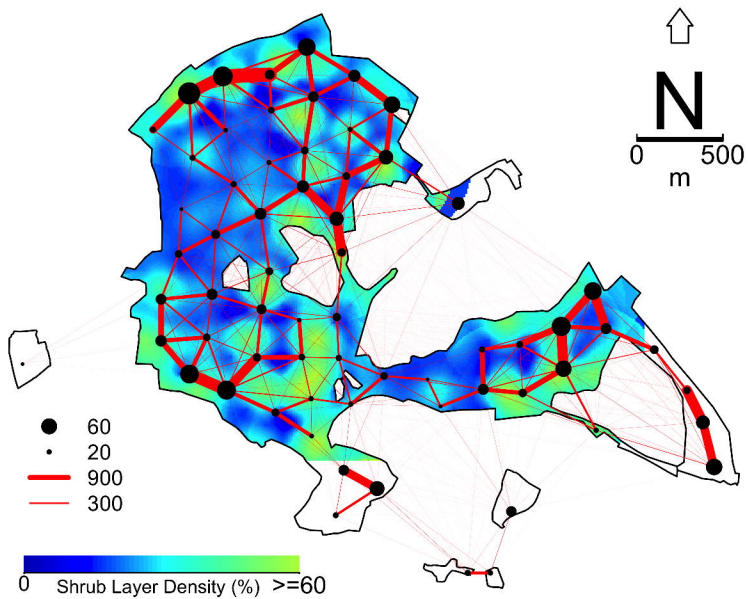



**A**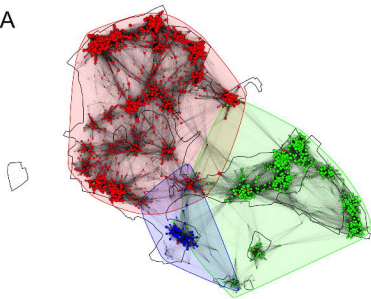**B**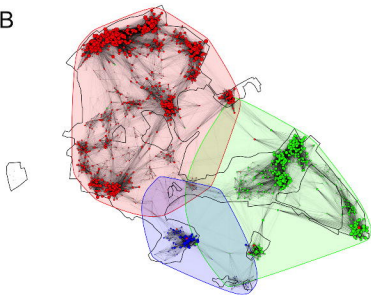**C**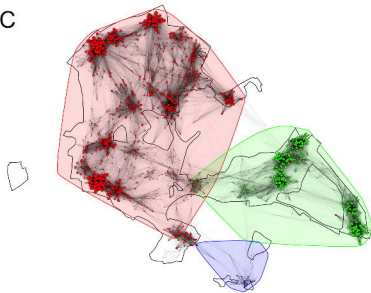**D**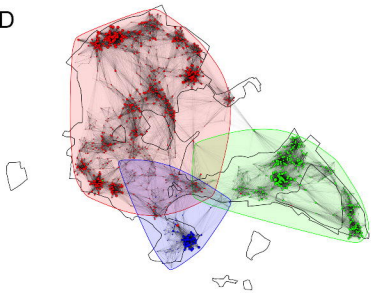



Probability of re-occurring in the same community

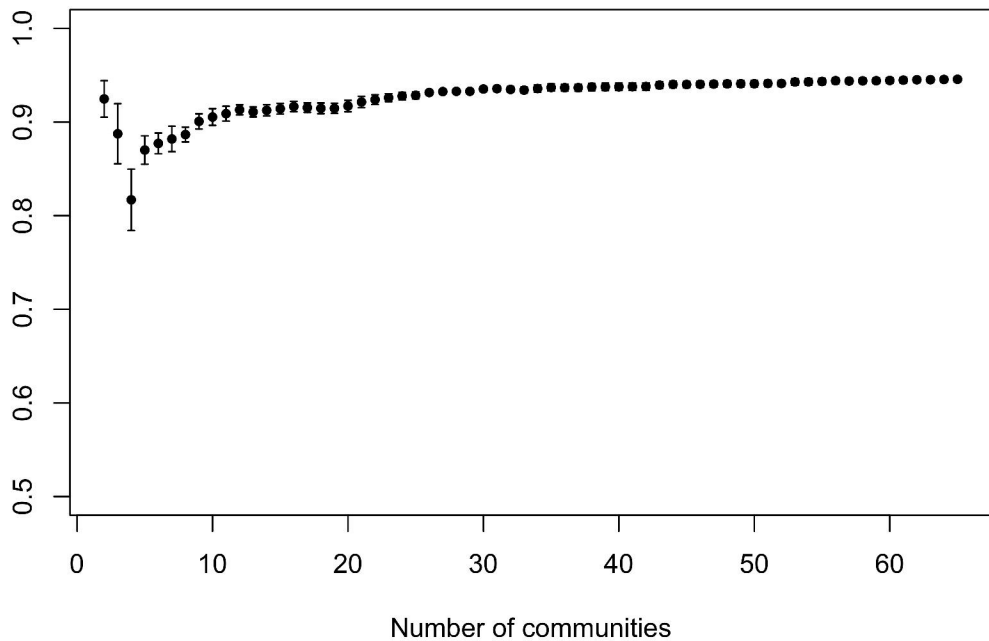

A

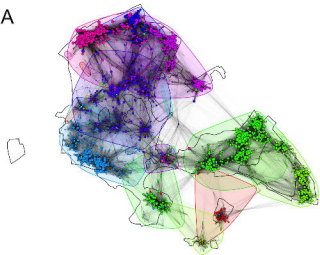

B

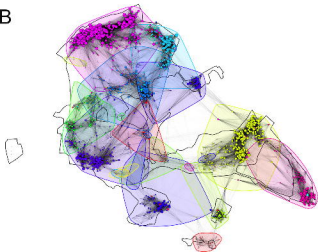

C

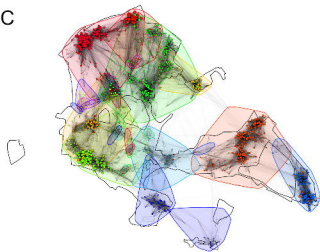

D

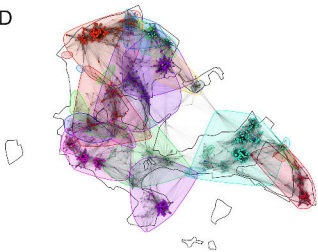

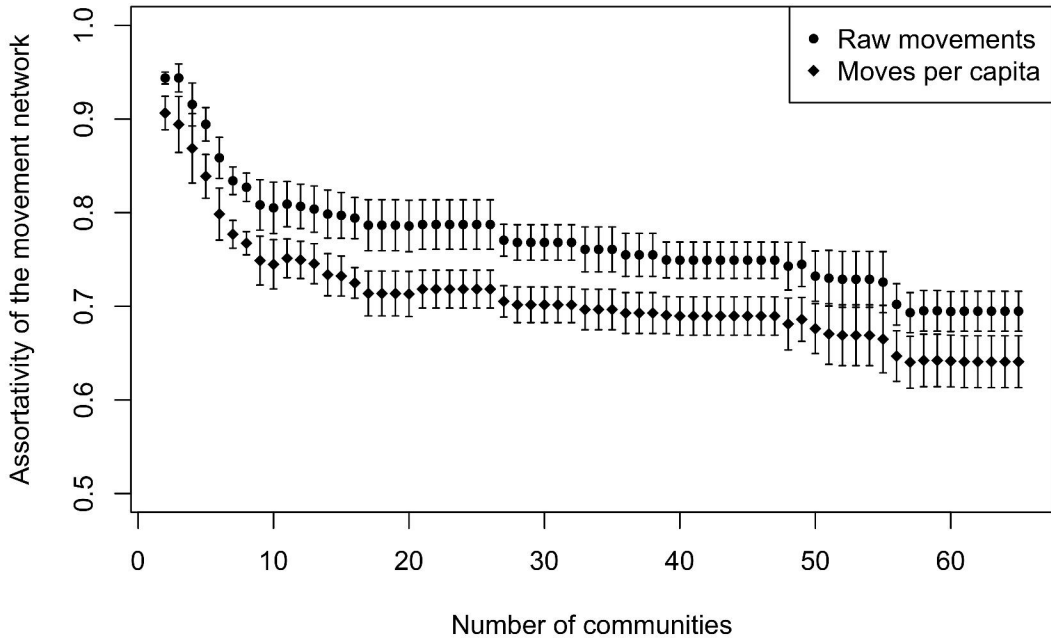

Source: http://biorxiv.org/content/10.1101/085944v1.full.pdf
